# Supplementary material
Source: Springer Nature journal article supplement (https://www.springermedizin.de/resource/supplementary/12875_2010_512_MOESM1_ESM.pdf/9434768)
Supplement: MOESM1 [file 9434768]

**Sore throat / Pharyngitis / Tonsillitis:** click to view any of these tools to support delayed or non-prescribing

**Summary of recommendations  
for antibiotic prescribing**

**Printable patient information  
about antibiotic use**

**Summary of evidence**

**Prescription indication**

**Complications / risk of  
non-prescribing**

**Alternative treatment  
options and suggestions**
